# Supplementary material
Source: Research Square preprint supplement (doi:10.21203/rs.3.rs-9543296/v1)
Supplement: Supplementary file 1 [file 8fbd374c0534c0edb0900356.pdf]

# Electrochemical characterization of *C. pasteurianum* hydrogenase II and four site-directed variants: catalysis and inhibition

Miriam Malagnini, Andrea Fasano, Aurore Bailly, Luzie H. I. Hardt, Theresa Wenig, Sophie Webb, Ross D. Milton, Vincent Fourmond, Christophe Léger

|                                                                        |           |
|------------------------------------------------------------------------|-----------|
| <b>Biochemical methods</b>                                             | <b>1</b>  |
| Cpl                                                                    | 1         |
| CpII                                                                   | 2         |
| <b>Electrochemistry</b>                                                | <b>4</b>  |
| Methods                                                                | 4         |
| Voltammetric catalytic responses                                       | 4         |
| Michaelis constants                                                    | 6         |
| CO inhibition                                                          | 7         |
| Inhibition of CpII by oxygen                                           | 8         |
| Inhibition of Cpl by oxygen                                            | 9         |
| <b>Comparison of the protein sequences of clostridial hydrogenases</b> | <b>10</b> |
| Alignment                                                              | 10        |
| Identity and similarity                                                | 13        |
| <b>References</b>                                                      | <b>13</b> |

## Biochemical methods

### Cpl

Holo-Cpl FeFe-hydrogenase from *Clostridium pasteurianum* W5 (WP\_004455619.1), carrying a C-terminal Strep-tag, was heterologously produced in *Escherichia coli* BL21(DE3)  $\Delta$ iscR cells alongside the HydEFG maturases from *Shewanella oneidensis*, as reported recently[1] and based on an earlier method[2–4]. Briefly, *E. coli* BL21(DE3)  $\Delta$ iscR containing pET21(b)-*hydA* (for Cpl) and pACYCDuet-1-*hydEF-hydGX* (for the HydEFG maturases) was cultivated aerobically at 37°C in 3 L of Lysogeny Broth (LB) medium containing 100 mM MOPS buffer (pH 7.4), along with 25 mM glucose, 2 mM ferric ammonium citrate and the necessary antibiotics (kanamycin, ampicillin, chloramphenicol, standard working concentrations). Upon reaching an optical density of  $\sim 0.5_{(600\text{ nm})}$  the culture was transferred to a COY anoxic chamber ( $\sim 3\%$  H<sub>2</sub>, balance N<sub>2</sub>) where cysteine (2 mM), sodium fumarate (25 mM) and IPTG (0.5 mM) were added and the culture was incubated at 18°C for 16 h. Following gene expression, the cells were harvested by centrifugation and resuspended at 2:1 v/w in Tris:HCl

buffer (50 mM, pH 8) containing NaCl (300 mM) and sodium dithionite (2 mM). The cells were lysed by sonication on ice in the presence of a few  $\mu\text{g}$  of DNase and the cell debris was pelleted by centrifugation at  $30,000 \times g$  for 1 h at  $4^\circ\text{C}$ . The C-terminally strep-tagged *Cpl* protein was subsequently purified by FPLC over a StrepTrapXT column (5 mL column volume, Cytiva, 1 mL/min flow-rate) in the same buffer and 50 mM biotin was used to elute the column-bound *Cpl* protein. Biotin was removed by desalting over a HiPrep 26/10 column (Cytiva) and the *Cpl* sample was concentrated over a stirred-cell concentrator (Millipore), flash-frozen in liquid  $\text{N}_2$  and stored in the same until use.  $\text{H}_2$  production specific activity assays ( $\sim 70 \mu\text{mol min}^{-1} \text{mg}^{-1}_{\text{protein}}$ ) were performed in MOPS buffer (pH 7, 100 mM) at  $37^\circ\text{C}$  containing methylviologen (1 mM), sodium dithionite (100 mM) and  $58 \mu\text{g}$  of *Cpl* using a GC-TCD (SRI Instruments) over a molecular sieve  $5 \text{ \AA}$  column with Ar as the carrier gas.

## CpII

### Gene synthesis

The accession numbers of CpII hydrogenase sequence is WP\_003446424.1.

The DNA sequence was optimized for production in E.coli, and synthesised in the MCS1 of the pET-Duet1 between NcoI and NotI with a C-terminal Streptag .

### Mutagenesis of CpII : S73A, S99A, T223M, T377A

The mutagenesis were performed using the Q5<sup>®</sup> High-Fidelity DNA Polymerase (NEB), and the user protocol. We used the following primers:

CpII S73A forward : 5' TGTGCCCGGTGTACGCTATTACCGAAG 3'

CpII S73A reverse : 5' GCTCACTTCGGTAATAGCGTACACCGGG 3'

CpII S99A forward : 5' GTGATTTTCAGACCGCACCGAGCGTGC 3'

CpII S99A reverse : 5' GCACGCTCGGTGCGGTCTGAAAAATCAC 3'

CpII T223M forward : 5' TTGTGAACGTGGCGGTGATGCCGTGCA 3'

CpII T223M reverse : 5' TGCACGGCATCACCGCCACGTTCAAA 3'

CpII T377A forward : 5' GATTTTGTGGAAGTGATGGCATGCCGCG 3'

CpII T377A reverse : 5' GCCGCCGCGGCATGCCATCACTTCCACA 3'

### WT, S99A and T223M

#### Protein production

We produced WT CpII and the S99A and T223M mutants of CpII as described in ref. [5]. The yield WT CpII is  $\approx 400 \mu\text{g/L}$ .

### T377A and S73A

Protein preparation: As described by Kuchenreuther and coauthors [4], *CpII* T377A and S73A variants were recombinantly expressed in *Escherichia coli* BL21 (DE3)  $\Delta\text{iscR}$  [3] in their apo state without coexpression of the maturase genes. Apo-hydrogenases only harbor the [4Fe4S]-subcluster of the H-cluster, hence missing the catalytically essential  $2\text{Fe}_\text{H}$ -subcluster. Minor modifications to the protocol described by Kuchenreuther and coauthors included the aerobically cultivation of the expression cultures at  $37^\circ\text{C}$  and the addition of 5 mM L-cysteine instead of 2 mM L-cysteine [4]. After reaching an  $\text{OD}_{600}$  of 0.4-0.6, protein expression was induced under anoxic conditions (97.5 %  $\text{N}_2$  and 2.5 %  $\text{H}_2$  atmosphere) in an anoxic chamber (Coy Laboratories) by addition of IPTG (0.5 mM).

The cultures were incubated overnight at ambient temperatures. All following protein purification steps were performed under anoxic conditions (97.5 % N<sub>2</sub> and 2.5 % H<sub>2</sub> atmosphere) in an anoxic chamber (Coy Laboratories). All solutions used during protein purification were degassed prior to use. After cell harvest, the cell pellet was resuspended in 0.1 M Tris-HCl buffer (pH 8.0) supplemented with 2 mM sodium dithionite (NaDT). Cell lysis was facilitated first by the addition of lysozyme (10 mg per liter expression culture) and Triton X-100 (1 % v/v) to the resuspended cells with an incubation period of 1 h on ice and second by sonication on ice. To pellet cell debris, the samples were centrifuged at 181,000 x *g* for 1 h at 4 °C. Purification of the *CpII* variants was conducted via affinity chromatography according to the manufacturer's instructions enabled by a C-terminal Strep-tag II, which selectively binds to the Strep-Tactin® Superflow resin (IBA Lifesciences). The samples were concentrated via spin filtration (30 kDa MWCO) and stored under anoxic conditions in 0.1 M Tris-HCl buffer (pH 8.0) supplemented with 2 mM NaDT at 4 °C. Protein concentrations were determined employing the Bradford protein assay in reference to a BSA standard calibration curve.

*In-vitro* Maturation: All steps were conducted under anoxic conditions (97.5% N<sub>2</sub> a 2.5% H<sub>2</sub> atmosphere) in an anoxic chamber (Coy Laboratories) as described by Esselborn and coauthors [6]. An excess of the 2Fe<sub>H</sub><sup>MIM</sup> complex (Fe<sub>2</sub>[μ-(SCH<sub>2</sub>)<sub>2</sub>NH](CN)<sub>2</sub>(CO)<sub>4</sub>[Et<sub>4</sub>N]<sub>2</sub>), synthesized as described previously [7], was added to the apo-*CpII* samples and incubated for 135 min on ice in the dark to ensure successful insertion of 2Fe<sub>H</sub><sup>MIM</sup> into the apo-hydrogenases and its conversion to the active holo-enzyme. To prevent potential light-induced decomposition of the cofactor or the cofactor mimic, 2Fe<sub>H</sub><sup>MIM</sup> and holo-hydrogenases were handled under dim light conditions. Afterwards, spin filtration (30 kDa MWCO) was employed to remove excess 2Fe<sub>H</sub><sup>MIM</sup> from the holo-hydrogenases and to exchange the buffer to 0.1 M potassium phosphate buffer (pH 6.8) supplemented with 2 mM NaDT, while minimizing protein loss. Holo-*CpII* samples were aliquoted and stored under anoxic conditions at 4 °C. Protein concentrations were determined via Bradford assay using a BSA standard calibration curve.

# Electrochemistry

## Methods

Protein films for CpII WT and all the variants were produced by applying a small drop (0.5  $\mu$ l) of protein solution with a concentration in the nM range onto a freshly polished pyrolytic graphite edge electrode (diameter: 3 mm), and letting it dry for about 30 seconds. The electrode was inserted in the electrochemical cell filled with mixed buffer (containing 5 mM of each of MES, CHES, HEPES, TAPS, Na-acetate, and Na<sub>2</sub>SO<sub>4</sub> 100 mM, titrated with NaOH 1 M or H<sub>2</sub>SO<sub>4</sub> 1M, always chloride-free), and rotated at a high rate (3000 rpm) to prevent H<sub>2</sub> depletion near the electrode surface. The temperature of the electrochemical cell was set to 30°C.

We use chloride free buffers because halides inhibit some FeFe-hydrogenases[8], but the inhibition of CpI by halides is slow, and we saw no effect of chlorides on H<sub>2</sub>-oxidation by CpII.

## Voltammetric catalytic responses

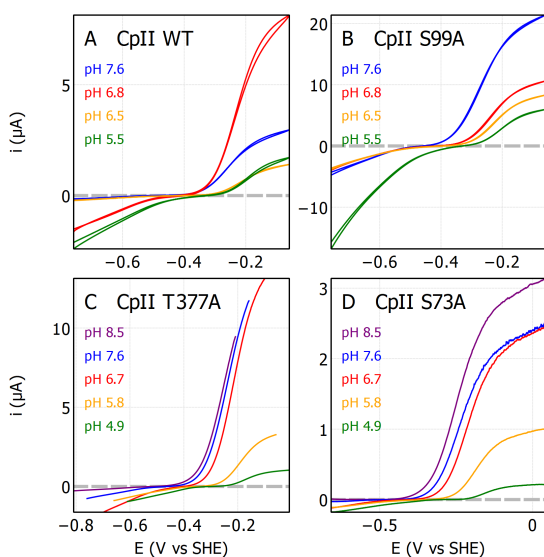

**Figure S1.** Cyclic voltammograms recorded with CpII WT and variants S99A, T377A and S73A under H<sub>2</sub> 100%, at 30°C, with a scan rate of 20 mV/s and electrode rotation rate of 3000 rpm. The precise value of the pH was calculated from the equilibrium potential (measured thanks to a film of a reversible hydrogenase, *DdHydAB* in this case, using the same buffers) via the Nernst equation.

The following **table S1** reports, for CplI WT and its variants (except T223M), the values of the two catalytic potentials, their difference (that is a direct measure of the irreversibility of an enzyme) and the catalytic bias measured at different pHs. CplI WT is added for comparison. (\*) Regarding some of the mutants, the fits of the model to the cyclic voltammetric data were not as good as for WT CplI, and the resulting values of the catalytic potentials and catalytic bias are less reliable.

|         | pH  | Ecat ox (*)<br>(mV vs SHE) | Ecat red (*)<br>(mV vs SHE) | $\Delta E$ (*)<br>(mV) | bias (*) |
|---------|-----|----------------------------|-----------------------------|------------------------|----------|
| CplI WT | 7.6 | -288                       | -551                        | 263                    | 16.4     |
|         | 6.8 | -261                       | -511                        | 250                    | 5.8      |
|         | 6.8 | -256                       | -518                        | 262                    | 5.4      |
|         | 6.8 | -256                       | -502                        | 246                    | 10.0     |
|         | 6.5 | -244                       | -481                        | 237                    | 7.6      |
|         | 5.5 | -220                       | -442                        | 222                    | 0.9      |
| S99A    | 7.6 | -320                       | -549                        | 229                    | 5.2      |
|         | 6.8 | -283                       | -515                        | 232                    | 2.2      |
|         | 6.8 | -277                       | -515                        | 238                    | 2.7      |
|         | 6.8 | -273                       | -512                        | 239                    | 3.5      |
|         | 6.8 | -271                       | -504                        | 233                    | 5.2      |
|         | 6.5 | -257                       | -492                        | 235                    | 3.0      |
|         | 5.5 | -229                       | -453                        | 224                    | 0.4      |
| T377A   | 8.5 | -299                       | -615                        | 316                    | 58.1     |
|         | 7.6 | -282                       | -561                        | 279                    | 17.7     |
|         | 6.7 | -249                       | -499                        | 250                    | 7.9      |
|         | 6.7 | -245                       | -508                        | 263                    | 9.6      |
|         | 5.8 | -209                       | -461                        | 252                    | 3.4      |
|         | 4.9 | -183                       | -412                        | 229                    | 0.9      |
| S73A    | 8.5 | -288                       | undet.                      | /                      | /        |
|         | 7.6 | -269                       | -538                        | 269                    | 70.4     |

|            |     |      |      |     |      |
|------------|-----|------|------|-----|------|
|            | 6.7 | -247 | -498 | 251 | 8.9  |
|            | 6.7 | -239 | -493 | 254 | 14.6 |
|            | 5.8 | -203 | -449 | 246 | 6.8  |
|            | 4.9 | -165 | -425 | 260 | 1.1  |
| <i>Cpl</i> | 7.0 | -399 | -474 | 75  | 0.3  |

## Michaelis constants

To measure the Michaelis-Menten constants, the H<sub>2</sub> oxidation current was measured at different potentials while the cell solution, initially saturated with H<sub>2</sub>, was flushed with argon. The value of K<sub>M</sub> expressed in atm can be converted to mM using a H<sub>2</sub> solubility of 0.75 mM/atm at 30 °C.

The raw data were then corrected for film loss using QSoas, by the “b” command.

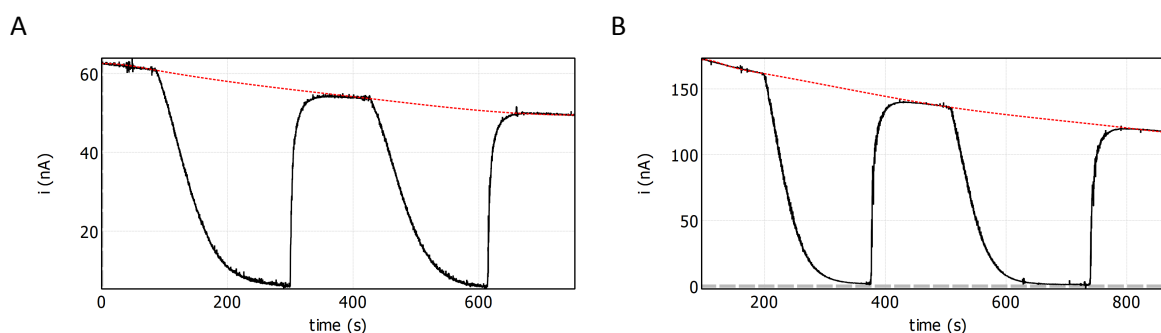

**Figure S2.** Raw chronoamperometric H<sub>2</sub>-oxidation data for Cpl WT (panel A) and T223M (panel B), when the electrochemical cell is subsequently flushed with H<sub>2</sub> and Ar to measure the Michaelis constant for H<sub>2</sub>. The fact that T223M has a K<sub>M</sub> which is almost twice the WT value is visible in the data. Red dotted lines represent the correction of the film loss, obtained using the program QSoas[9] and its command “b”.

## CO inhibition

CO inhibition was tested in chronoamperometry experiments by measuring the current as a function of time at a certain potential (-260 or -160 or +40 mV), and injecting two consecutive aliquots of a CO-saturated buffer. This results in an immediate increase of the CO concentration in the open electrochemical cell, that successively decays exponentially while CO is flushed away by the continuous bubbling of H<sub>2</sub>. The precise initial concentration of CO into the cell can be calculated knowing the injection volume, the buffer volume into the cell, and the concentration of CO into the vial (that is 1 mM at 20°C, i.e. the temperature at which the buffer was kept).

The raw data were first corrected to remove the effect of film loss using QSoas, a process that can be tricky in case the reaction with CO is not fully reversible.

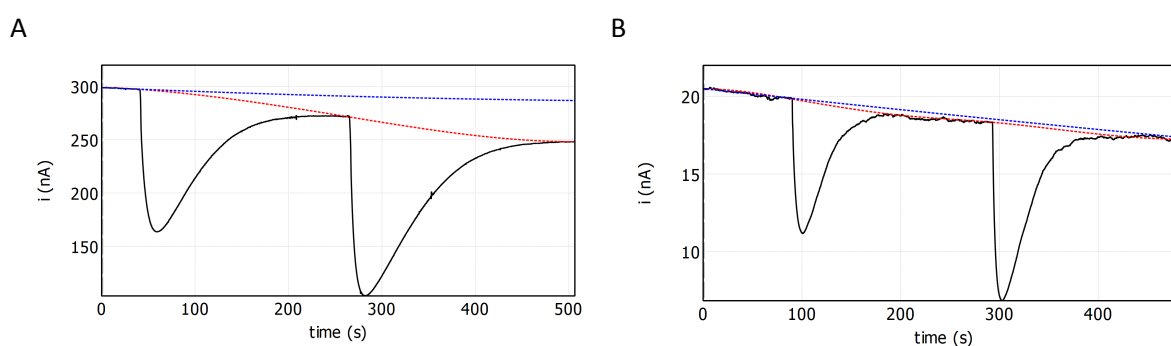

**Figure S3.** Panel A shows, for *CplI* WT, how to correct for the film loss assuming that the reaction is fully reversible (red baseline, obtained using the program QSoas[9] and its command “b”), or partly irreversible (blue baseline, obtained using the program QSoas[9] and its command “B”). For each of the enzymes WT, S99A, T223M and T377A it makes a difference to use either one or the other command. Panel B shows the same analysis with the S73A variant. In this case, there is no evidence that the reaction may be partly irreversible. Experimental conditions: H<sub>2</sub> 100%, electrode potential + 40 mV vs SHE, electrode rotation rate 3000 rpm, 30°C, in chloride-free mixed buffer pH7.

## Inhibition of *CpII* by oxygen

O<sub>2</sub> inhibition was tested in chronoamperometry experiments by measuring the current as a function of time at different potentials (ranging from -260 to +240 mV vs SHE), and injecting aliquots of an O<sub>2</sub>-saturated buffer. This results in an immediate increase of the O<sub>2</sub> concentration in the open electrochemical cell, that successively decays exponentially while O<sub>2</sub> is flushed away by the continuous bubbling of H<sub>2</sub>. The precise initial concentration of O<sub>2</sub> into the cell can be calculated knowing the injection volume, the buffer volume into the cell, and the concentration of O<sub>2</sub> into the vial (that is 1.4 mM at 20°C, i.e. the temperature at which the buffer was kept).

The raw data were fitted with a model that takes into account:

- A sudden drop in current right after the injection due to the dilution of H<sub>2</sub>. This contribution is small since the *K<sub>m</sub>* is rather small;
- A sudden drop in current due to the reduction of some of the injected O<sub>2</sub> at the electrode, that happens even at high potentials;
- An irreversible loss in current due to the inactivation of the enzyme, described by the bimolecular rate constant *k<sub>d</sub>* (for *CpII* WT, S99A, T223M and T377A);
- A partially reversible loss in current for *CpII* S73A, described by a certain bimolecular inactivation rate constant *k<sub>i</sub>* and a reactivation rate constant *k<sub>a</sub>*.

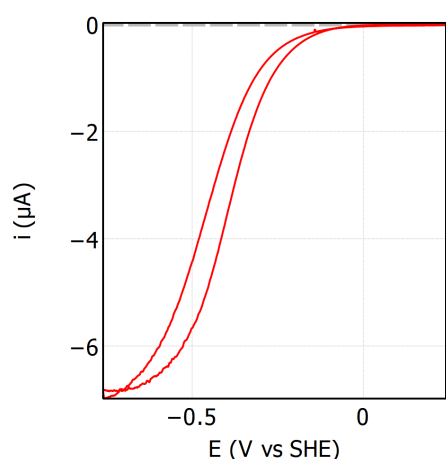

**Figure S4.** Direct reduction of O<sub>2</sub> at a rotating disc PGE electrode at T=30°C, pH=7, electrode rotation rate=2000 rpm. 40 µM O<sub>2</sub> was injected at high potential before sweeping the electrode potential down. The capacitive current recorded in the absence of O<sub>2</sub> was subtracted.

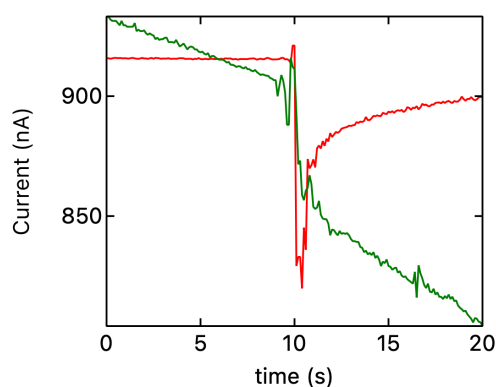

**Figure S5.** In green : a chronoamperometry experiment performed at +40 mV with a film of *CpII* WT, where an O<sub>2</sub>-saturated buffer is injected at t=10s. In red, the same experiment but without any enzyme on the electrode, offsetting the two signals for better comparison. The sudden drop in current is mainly explained by the reduction of O<sub>2</sub> at the electrode, with a minor contribution given by the depletion of H<sub>2</sub>.

## Inhibition of *Cpl* by oxygen

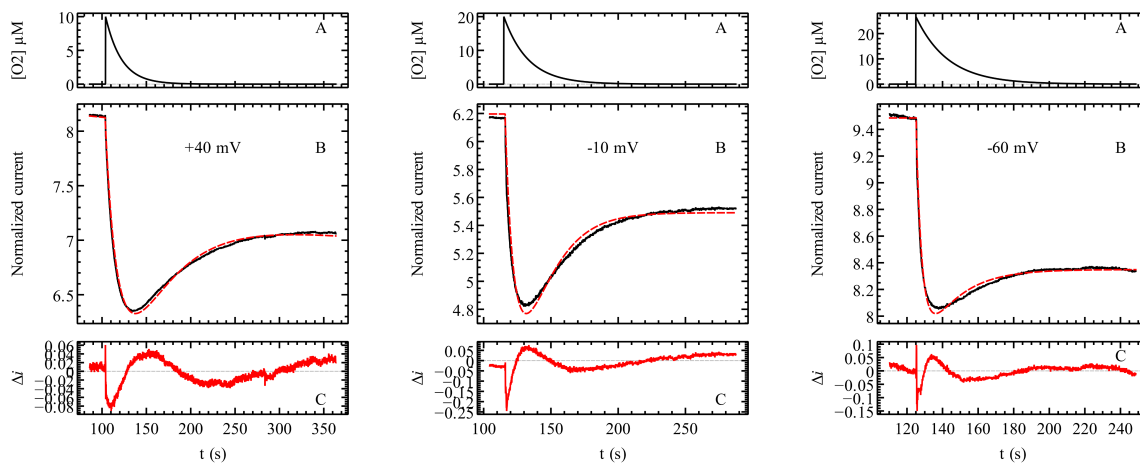

**Figure** : fits of the two-step model to three selected  $O_2$  inhibition experiments with *Cpl* WT at different potentials. Panel A:  $O_2$  concentration profile. Panel B: data in black solid line and fit of the model described by eq 4 and 5 in dash red line. Panel C: difference between the fit and the data. Conditions: pH 7; 12°C; 3k rpm.





```

372 376 380 384 388 392 396 400 404 408 412 416 420 424 428 432 436 440
Cr-HydA1  TLRQIDHVTITVRELGNIFKRGITNLAEIPGCEVDNPMGVCSGACVLFCTGGVMEALRTAYELFTGTPL 258
Cp1-066021221 GLRDIDASLITRELAAMTKDAKIKFADLEDSVDPMAGTYSGAGTIFGATGGVMEALRSKDAENRDL 439
Cp1-004455619 GLRDIDAVITRELAAMTKDAKIPFAKLEDSVDPMAGEYSGAGTIFGATGGVMEALRSKDAENRDL 440
Cp1-015613486 GIRDIDAVITRELAAMTKDAKIPFAKLEDSVDPMAGEYSGAGTIFGATGGVMEALRSKDAENRDL 440
Cp1-415523956 GIRDIDAVITRELAAMTKDAKIPFAKLEDSVDPMAGEYSGAGTIFGATGGVMEALRSKDAENRDL 440
Cp2-287823468 TMRDMDYVITVRELGNWIKESNIDFQAHQGSKYDLSLDRSGGGGIFGCTGGVMEALRTAYEYVITGENP 317
Cp2-267187445 NIRDMDYVITVRELGNWIKESNIDFQAHQGSKYDLSLDRSGGGGIFGCTGGVMEALRTAYEYVITKKNP 317
Cp2-003446424 NIRDMDYVITVRELGNWIKESNIDFQAHQGSKYDLSLDRSGGGGIFGCTGGVMEALRTAYEYVITKKNP 317
Cp2-015617234 TMRDMDYVITVRELGNWIKESNIDFQAHQGSKYDLSLDRSGGGGIFGCTGGVMEALRTAYEYVITKKNP 317
Cp2-415524888 TMRDMDYVITVRELGNWIKESNIDFQAHQGSKYDLSLDRSGGGGIFGCTGGVMEALRTAYEYVITKKNP 317
Cp3-066021653 ..DAIDFVLTPEELKGTREVLNINPEEISE...TPTINYASREGRLYARAGGVSTSVSEAVKLFPPDY. 347
Cp3-003447632 ..GDIDFVLTPEELKGTREVLNINPEEISE...DPTDYASREGRLYARTGGVSVSEAVKLFPPDKK. 347
Cp3-267187510 ..GDIDFVLTPEELKGTREVLNINPEEISE...DPTDYASREGRLYARTGGVSVSEAVKLFPPDKK. 347
Cp3-015617566 ..GDIDFVLTPEELKGTREVLNINPEEISE...DPTDYASREGRLYARTGGVSVSEAVKLFPPDKK. 347
Cp3-287821895 ..GDIDFVLTPEELKGTREVLNINPEEISE...DPTDYASREGRLYARTGGVSVSEAVKLFPPDKK. 347
Cp4-041711331 ..DAVDYVLTPEELVALDFAFVDPSSC.E...DITVDEGSIIFGRGFAAGGLTAAIESYVKEK..GTE. 410
Cp4-023976023 ..DAVDYVLTPEELVALDFAFVDPPTCC.E...DIVVDGASIFGRNFVAVGGGLTAAIENYVQEK..GVN. 411
Cp4-079439160 ..DAVDYVLTPEELVALDFAFVDPAAAC.E...DIVVDEASIFGRNFVAVGGGLTAAIQNYVQEK..GVN. 411
Cp4-077858408 ..DSVDYVLTPEELVALDFAFVDPANCC.E...DIVVDEASIFGRNFVAVGGGLTAAIENYVQEK..GVN. 410

```

```

444 448 452 456 460
Cr-HydA1  P..RLSLSEVRGMDGIKENTITMVPAPGSKFEELLKHRAAARAEAAAHTGPGPLAWDGGAGFTSEDGRGG 326
Cp1-066021221 H..DVDYTVRGLNGIKAEAEVEI.....AQ 462
Cp1-004455619 E..DIEYKQVRGLNGIKAEAEVEI.....NN 463
Cp1-015613486 E..NVEYKQVRGLDGIKAEAEVEL.....AG 463
Cp1-415523956 E..DIEYKQVRGLDGIKAEAEVEL.....AG 463
Cp2-287823468 PKDLYNLEVVGDMDGIREAQITM.....GD 342
Cp2-267187445 PKDLYNLEAVGNMDDIREAQVTI.....GD 342
Cp2-003446424 PKDLYNLEAVGNMDDIREAQVTI.....GD 342
Cp2-015617234 PKDLYNLEAVGNMDDIREAQVTI.....GD 342
Cp2-415524888 PKDLYNLEAVGNMDDIREAQVTI.....GD 342
Cp3-066021653 ..... 347
Cp3-003447632 ..... 347
Cp3-267187510 ..... 347
Cp3-015617566 ..... 347
Cp3-287821895 ..... 347
Cp4-041711331 ..... 410
Cp4-023976023 ..... 411
Cp4-079439160 ..... 411
Cp4-077858408 ..... 410

```

```

H H
x x
464 468 472 476 480 484 488 492 496 500 504 508 512 516 520 524 528 532
Cr-HydA1  ITLRVAVANGLGNAKKLITIMQAQEAQYDFVEITMCPAGCGVGGGGPRTSDK.....AITQKRLQAALYNL 391
Cp1-066021221 NKYNVAVINGANFFEFMKSGRMDEKQYHFIEVMACPGGCVNGGGQPHISAIDREKIDYKTLRASVLYNQ 532
Cp1-004455619 NKYNVAVINGASNLFFMKSGRMDEKQYHFIEVMACHGGCVNGGGQPHVNPDKLEKVDIKKVRASVLYNQ 533
Cp1-015613486 EKYSVAVINGASNLFFMKSGRMDEKQYHFIEVMACHGGCVNGGGQPHVNPDKLEKVDIKKVRASVLYNQ 533
Cp1-415523956 NKYNVAVINGASNLFFMKSGRMDEKQYHFIEVMACHGGCVNGGGQPHVNPDKLEKVDIKKVRASVLYNQ 533
Cp2-287823468 YVINIAIVHGTANARKLIERVKSSEKRYDFVEVMTCRGGIGGGGQPKVIPMADKVR..KKRIAGLYNK 410
Cp2-267187445 YVINIAIVHGTANARKLIERVKSSEKRYDFVEVMTCRGGIGGGGQPKVIPMADKVR..KKRIAGLYNK 410
Cp2-003446424 YVINIAIVHGTANARKLIERVKSSEKRYDFVEVMTCRGGIGGGGQPKVIPMADKVR..KKRIAGLYNK 410
Cp2-015617234 YVINIAIVHGTANARKLIERVKSSEKRYDFVEVMTCRGGIGGGGQPKVIPMADKVR..KKRIAGLYNK 410
Cp2-415524888 YVINIAIVHGTANARKLIERVKSSEKRYDFVEVMTCRGGIGGGGQPKVIPMADKVR..KKRIAGLYNK 410
Cp3-066021653 ELFKSIKADGVPNCKELLEKAQNEKLPANFEMGMCSCGCCVGGPKALISADTKKI.....VNET 407
Cp3-003447632 DLFKSVQANVIECKKILEKAQNEVAANFIEGMCVGGCVGGPKALIPKPKGREK.....VNEF 407
Cp3-267187510 DLFKSVQANVIECKKILEKAQNEVAANFIEGMCVGGCVGGPKALIPKPKGREK.....VNEF 407
Cp3-015617566 DLFKSIQANVIECKKILEKAQNEVAANFIEGMCVGGCVGGPKALIPKPKGREK.....VNEF 407
Cp3-287821895 DLFKSVQANVIECKKILEKAQNEVAANFIEGMCVGGCVGGPKALIPKPKGREK.....VNEF 407
Cp4-041711331 VNEFSVQANVIECKKILEKAQNEVAANFIEGMCVGGCVGGPKALIPKPKGREK.....FTKI 470
Cp4-023976023 IDFKPVKISGVEIKKTMKAVGKLGQNFIEGMCVGGCVGGPKALIPKPKGREK.....FTKL 471
Cp4-079439160 VEFKPVQVSGGADIKKTMKAVGKLGQNFIEGMCVGGCVGGPKALIPKPKGREK.....FTKL 471
Cp4-077858408 IEFKPVKISGAEIKKTMKAVGKLGQNFIEGMCVGGCVGGPKALIPKPKGREK.....FTKI 470

```

P3

```

536 540 544 548 552 556 560 564 568 572
Cr-HydA1  DEKSTLRRSHENPSTIRELYDTVLGELGHKAH...ELLHTHVAVAGVVEEKDEKK 442
Cp1-066021221 DKNLPRKSHENPAITIKMYDSYFGKPGEGLAH...KLLHHVVEK..... 573
Cp1-004455619 DEHLTKRKHENTALLKMYQNYFGKPGEGRAH...EILHFVKK..... 574
Cp1-015613486 DAHLTKRKHENTALLKMYKDYFGKPGEGLAH...EILHFVKK..... 574
Cp1-415523956 DAHLTKRKHENTALLKMYKDYFGKPGEGRAH...KILHFVKK..... 574
Cp2-287823468 DQSVYQRLAHENPDITKVYDEFFKPLSPLAE...QILHTSVSSKNHILGE... 458
Cp2-267187445 DQSVYQRLAHENPDITKVYDEFFKPLSPLAE...ELLHTVSSKKHILGE... 458
Cp2-003446424 DQSVYQRLAHENPDITKVYDEFFKPLSPLAE...ELLHTVSSKKHILGE... 458
Cp2-015617234 DQSVYQRLAHENPDITKVYDEFFKPLSPLAE...ELLHTVSSKKHILGE... 458
Cp2-415524888 DQSVYQRLAHENPDITKVYDEFFKPLSPLAE...ELLHTVSSKKHILGE... 458
Cp3-066021653 AENSVDIKISLSDSPCLKDLNRIKNSVEDFNDKSKTEIFERNSE..... 451
Cp3-003447632 AENSVDIKISLSDSQMKKILNMLNITSKDFMDEEKIKIFERE..... 450
Cp3-267187510 AENSVDIKISLSDSQMKKILNMLNITSKDFMDEEKIKIFERE..... 450
Cp3-015617566 AENSVDIKISLSDSQMKKILSKLNTSADKDFMEDKIKIFERE..... 450
Cp3-287821895 AENSVDIKISLSDSQMKKILSKLNTSADKDFMEDKIKIFERE..... 450
Cp4-041711331 NQQTITKSVSANKVLEEYKGINLER..... 495
Cp4-023976023 NQQTITKSVLANVTLDEYKGINLER..... 496
Cp4-079439160 NQQTITKSVLSNKVLEEYKGINLER..... 496
Cp4-077858408 NQQTITKSVLSNKALEEYKGINLER..... 495

```

## Identity and similarity

**Table S2.** Identity and similarity between the protein sequences listed in main text table 1, calculator by TeXshade

| Cr            | Cp1-066021221 | Cp1-004455619 | Cp1-015613486 | Cp1-415523956 | Cp2-287823468 | Cp2-267187445 | Cp2-003446424 | Cp2-015617234 | Cp2-415524888 | Cp3-066021653 | Cp3-003447632 | Cp3-267187510 | Cp3-015617566 | Cp3-287821895 | Cp4-041711331 | Cp4-023976023 | Cp4-079439160 | Cp4-077858408 |      |
|---------------|---------------|---------------|---------------|---------------|---------------|---------------|---------------|---------------|---------------|---------------|---------------|---------------|---------------|---------------|---------------|---------------|---------------|---------------|------|
| Cr            | —             | 58.4          | 59.5          | 59.5          | 59.8          | 60.5          | 61.0          | 60.7          | 61.0          | 61.3          | 44.9          | 46.6          | 46.6          | 46.3          | 46.0          | 45.0          | 45.6          | 46.2          | 46.1 |
| Cp1-066021221 | 43.6          | —             | 82.0          | 81.3          | 82.0          | 55.8          | 56.3          | 56.3          | 56.7          | 56.3          | 37.6          | 38.6          | 38.6          | 39.1          | 38.6          | 38.8          | 38.3          | 38.8          | 38.8 |
| Cp1-004455619 | 43.3          | 71.5          | —             | 93.5          | 93.7          | 58.6          | 58.3          | 58.3          | 58.8          | 58.3          | 38.3          | 39.8          | 39.8          | 39.3          | 38.6          | 39.5          | 39.0          | 39.4          | 39.3 |
| Cp1-015613486 | 43.6          | 71.2          | 87.9          | —             | 95.6          | 58.8          | 58.6          | 58.6          | 59.0          | 58.3          | 38.0          | 38.8          | 38.8          | 38.8          | 37.9          | 39.5          | 38.3          | 39.6          | 39.1 |
| Cp1-415523956 | 43.6          | 70.5          | 89.8          | 92.3          | —             | 59.3          | 59.3          | 59.3          | 59.7          | 59.0          | 37.3          | 39.3          | 39.3          | 39.1          | 38.1          | 39.7          | 38.5          | 39.4          | 38.8 |
| Cp2-287823468 | 43.6          | 39.5          | 41.6          | 42.5          | 42.7          | —             | 94.5          | 94.5          | 96.5          | 95.6          | 39.1          | 39.7          | 39.7          | 39.7          | 38.9          | 39.7          | 40.2          | 40.5          | 39.4 |
| Cp2-267187445 | 44.7          | 40.9          | 42.5          | 43.2          | 43.4          | 89.7          | —             | 100.0         | 97.5          | 98.0          | 38.8          | 39.7          | 39.7          | 39.4          | 38.6          | 39.9          | 39.9          | 39.9          | 38.9 |
| Cp2-003446424 | 44.7          | 40.9          | 42.5          | 43.2          | 43.4          | 89.5          | 99.7          | —             | 97.5          | 98.0          | 38.5          | 39.4          | 39.4          | 39.2          | 38.6          | 39.9          | 39.9          | 39.9          | 38.9 |
| Cp2-015617234 | 45.2          | 41.3          | 42.5          | 42.9          | 43.2          | 92.3          | 96.2          | 96.0          | —             | 98.0          | 39.6          | 40.2          | 40.2          | 40.0          | 39.2          | 38.9          | 39.9          | 39.9          | 38.9 |
| Cp2-415524888 | 45.2          | 40.9          | 42.2          | 42.7          | 42.9          | 91.9          | 96.7          | 96.5          | 97.5          | —             | 39.1          | 40.0          | 40.0          | 39.7          | 38.9          | 38.9          | 40.2          | 40.2          | 39.2 |
| Cp3-066021653 | 26.4          | 21.9          | 22.4          | 21.9          | 21.9          | 22.8          | 22.8          | 22.8          | 23.6          | 23.6          | —             | 77.7          | 77.7          | 76.2          | 77.7          | 52.8          | 52.9          | 53.4          | 53.3 |
| Cp3-003447632 | 26.5          | 24.1          | 24.1          | 23.4          | 24.3          | 23.9          | 24.2          | 24.2          | 24.7          | 25.0          | 65.5          | —             | 99.7          | 94.4          | 93.3          | 50.8          | 50.4          | 50.7          | 50.6 |
| Cp3-267187510 | 26.5          | 23.8          | 24.3          | 23.1          | 24.5          | 23.9          | 24.2          | 24.2          | 24.7          | 25.0          | 65.7          | 99.5          | —             | 94.4          | 93.5          | 50.8          | 50.4          | 50.7          | 50.6 |
| Cp3-015617566 | 26.5          | 23.6          | 22.7          | 22.2          | 23.1          | 22.6          | 22.6          | 22.6          | 23.1          | 23.1          | 64.8          | 89.1          | 89.3          | —             | 94.8          | 50.3          | 50.0          | 51.4          | 50.6 |
| Cp3-287821895 | 27.4          | 23.8          | 22.2          | 22.0          | 22.7          | 23.1          | 23.1          | 23.1          | 23.6          | 23.6          | 65.1          | 87.7          | 88.2          | 90.2          | —             | 49.8          | 49.2          | 50.2          | 49.6 |
| Cp4-041711331 | 28.1          | 22.6          | 22.8          | 23.5          | 23.5          | 24.0          | 23.5          | 23.2          | 23.5          | 23.5          | 35.6          | 34.2          | 34.4          | 33.7          | 34.7          | —             | 87.8          | 91.1          | 90.3 |
| Cp4-023976023 | 27.0          | 22.1          | 23.4          | 22.6          | 22.8          | 22.9          | 22.6          | 22.6          | 22.9          | 22.9          | 35.1          | 33.1          | 33.4          | 33.4          | 34.3          | 77.9          | —             | 92.9          | 92.9 |
| Cp4-079439160 | 27.7          | 22.3          | 23.4          | 23.2          | 23.4          | 24.3          | 24.3          | 24.3          | 24.3          | 24.3          | 34.3          | 33.4          | 33.6          | 33.1          | 34.3          | 82.4          | 86.4          | —             | 95.5 |
| Cp4-077858408 | 26.7          | 21.7          | 22.4          | 22.8          | 22.6          | 22.6          | 22.4          | 22.6          | 22.6          | 22.6          | 35.4          | 33.9          | 34.2          | 33.7          | 34.4          | 82.4          | 86.0          | 88.8          | —    |

% identity

% similarity

## References

- [1] J. Khushvakov, R. Nussbaum, C. Cadoux, J. Duan, S.T. Stripp, R.D. Milton, Following electroenzymatic hydrogen production by rotating ring-disk electrochemistry and mass spectrometry, *Angew. Chem. Int. Ed Engl.* 60 (2021) 10001–10006. <https://doi.org/10.1002/anie.202100863>.
- [2] M.C. Posewitz, P.W. King, S.L. Smolinski, L. Zhang, M. Seibert, M.L. Ghirardi, Discovery of two novel radical S-adenosylmethionine proteins required for the assembly of an active [Fe] hydrogenase, *J. Biol. Chem.* 279 (2004) 25711–25720. <https://doi.org/10.1074/jbc.M403206200>.
- [3] M.K. Akhtar, P.R. Jones, Deletion of iscR stimulates recombinant clostridial Fe-Fe hydrogenase activity and H<sub>2</sub>-accumulation in *Escherichia coli* BL21(DE3), *Appl. Microbiol. Biotechnol.* 78 (2008) 853–862. <https://doi.org/10.1007/s00253-008-1377-6>.
- [4] J.M. Kuchenreuther, C.S. Grady-Smith, A.S. Bingham, S.J. George, S.P. Cramer, J.R. Swartz, High-yield expression of heterologous [FeFe] hydrogenases in *Escherichia coli*, *PLoS One* 5 (2010) e15491. <https://doi.org/10.1371/journal.pone.0015491>.
- [5] A. Fasano, A. Jacq-Bailly, J. Wozniak, V. Fourmond, C. Léger, Catalytic bias and redox-driven inactivation of the group B FeFe hydrogenase CpIII, *ACS Catal.* 14 (2024) 7001–7010. <https://doi.org/10.1021/acscatal.4c01352>.
- [6] J. Esselborn, C. Lambertz, A. Adamska-Venkates, T. Simmons, G. Berggren, J. Noth, J. Siebel, A. Hemschemeier, V. Artero, E. Reijerse, M. Fontecave, W. Lubitz, T. Happe, Spontaneous activation of [FeFe]-hydrogenases by an inorganic [2Fe] active site mimic, *Nat. Chem. Biol.* 9 (2013) 607–609. <https://doi.org/10.1038/nchembio.1311>.
- [7] S. Yadav, R. Haas, E.B. Boydas, M. Roemelt, T. Happe, U.-P. Apfel, S.T. Stripp, Oxygen sensitivity of [FeFe]-hydrogenase: a comparative study of active site mimics inside vs. outside the enzyme, *Phys. Chem. Chem. Phys.* 26 (2024) 19105–19116. <https://doi.org/10.1039/d3cp06048a>.
- [8] M. Del Barrio, M. Sensi, L. Fradale, M. Bruschi, C. Greco, L. de Gioia, L. Bertini, V. Fourmond, C. Léger, Interaction of the H-Cluster of FeFe Hydrogenase with Halides, *J. Am. Chem. Soc.* 140 (2018) 5485–5492. <https://doi.org/10.1021/jacs.8b01414>.
- [9] V. Fourmond, QSoas: A versatile software for data analysis, *Anal. Chem.* 88 (2016) 5050–5052. <https://doi.org/10.1021/acs.analchem.6b00224>.
- [10] J.B. Therien, J.H. Artz, S. Poudel, T.L. Hamilton, Z. Liu, S.M. Noone, M.W.W. Adams, P.W. King, D.A. Bryant, E.S. Boyd, J.W. Peters, The physiological functions and structural determinants of catalytic bias in the [FeFe]-hydrogenases CpI and CpII of *Clostridium pasteurianum* strain W5, *Front. Microbiol.* 8 (2017) 1305. <https://doi.org/10.3389/fmicb.2017.01305>.
